# Supplementary material for: Naked-eye-based selective detection of pyrophosphate with a Zn2+ complex in aqueous solution and electrospun nanofibers
Source: Royal Society of Chemistry journal article supplement (doi:10.1039/c4ra16742b), 2015-01-01
Supplement: c4ra16742b1.pdf [file c4ra16742b1.pdf]

## **Naked-eye-based selective detection of pyrophosphate with Zn<sup>2+</sup> complex in aqueous solution and electrospun nanofibers**

Zhanxian Li,\* Wenying Zhang, Xingjiang Liu, Chunxia Liu, Mingming  
Yu,\* Liuhe Wei\*

<sup>a</sup> College of Chemistry and Molecular Engineering, Zhengzhou University,  
Zhengzhou 450001, China. E-mail: lizx@zzu.edu.cn; yummm@zzu.edu.cn;  
weiliuhe@zzu.edu.cn Fax/Tel: +86 371 67781205

<sup>b</sup> College of Chemistry and Chemical Engineering, Central South University,  
Changsha, Hunan 410083, China

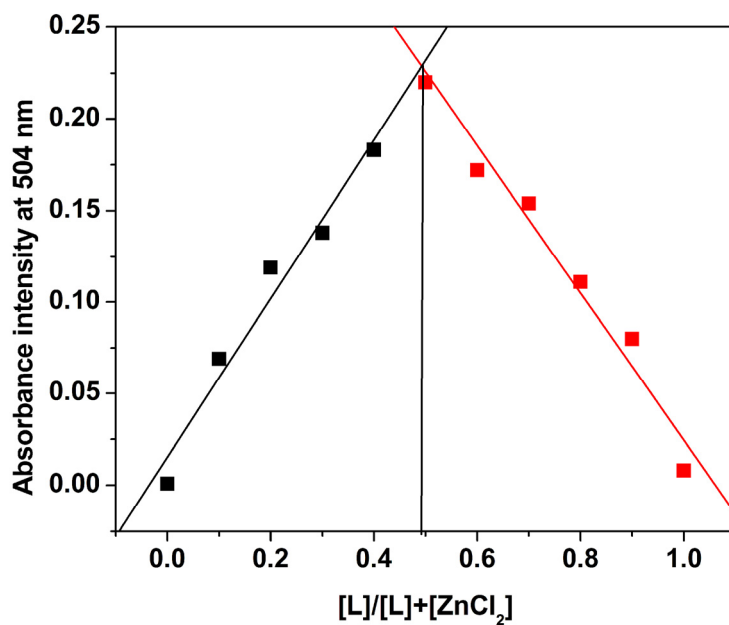

**Fig. S1** Job's plot of **L** with  $\text{Zn}^{2+}$  obtained by absorption spectra measurements and the wavelength used is 504 nm.

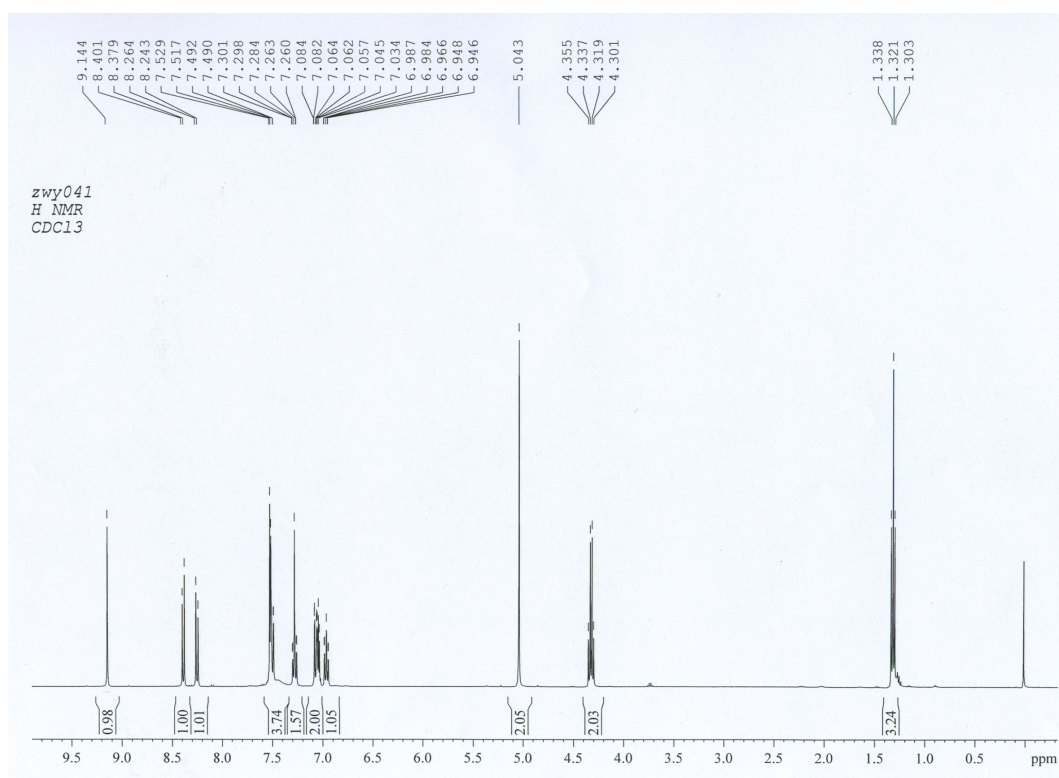

**Fig. S2**  $^1\text{H}$  NMR spectra of the product from the reaction of  $\text{ZnLCl}_2$  with PPI.

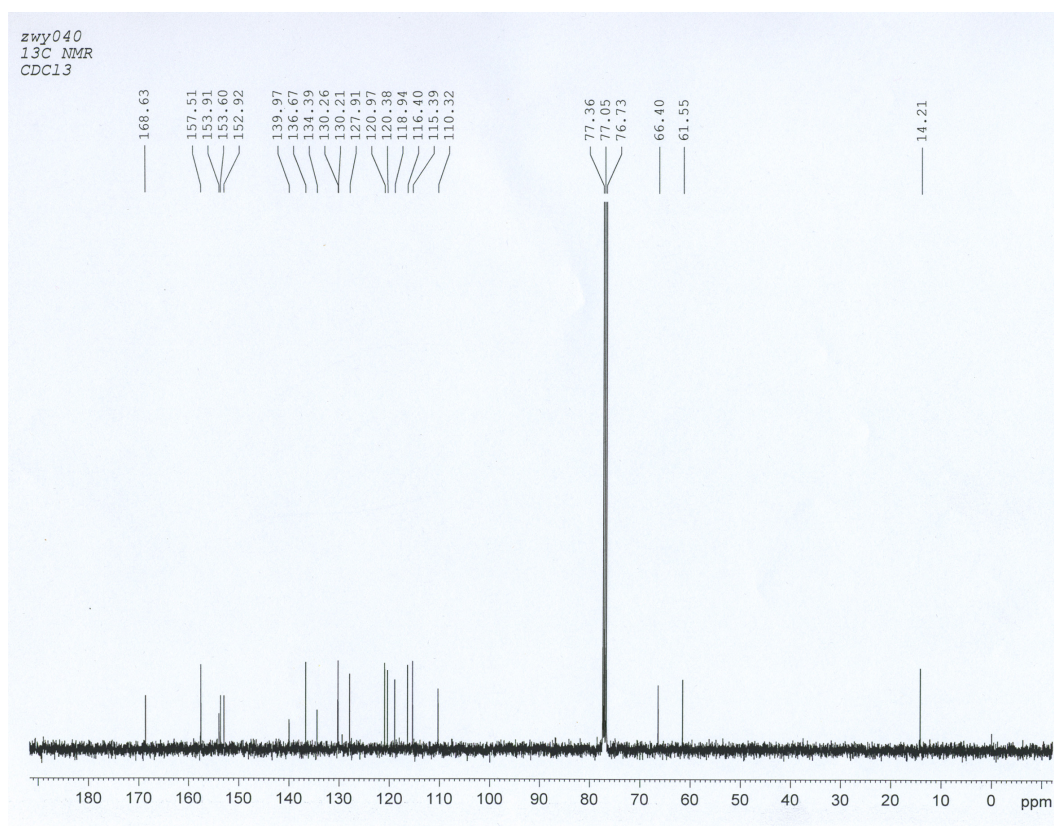

**Fig. S3**  $^{13}\text{C}$  NMR spectra of the product from the reaction of  $\text{ZnLCl}_2$  with PPI.

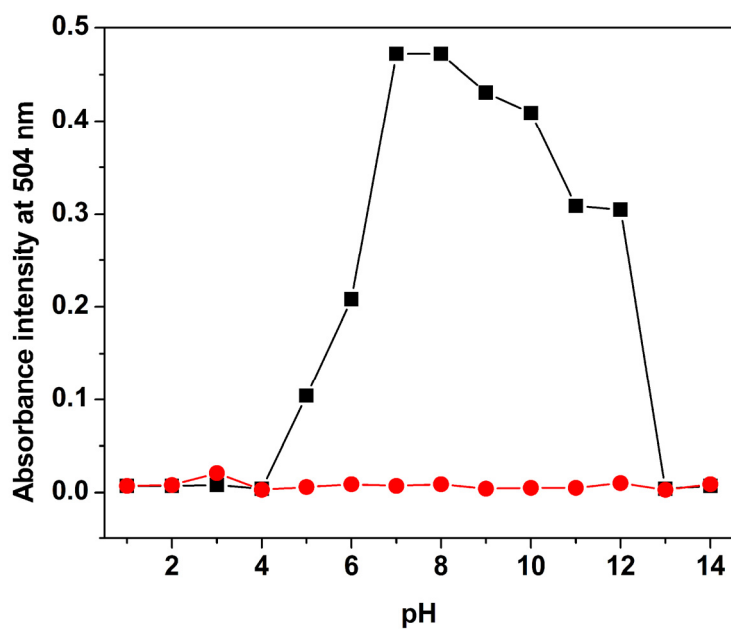

**Fig. S4** Absorbance intensity change of  $\text{ZnLCl}_2$  [ $6.0 \times 10^{-5}$  M, ethanol/HEPES (pH 7.4) = 10, v/v] before and after addition of PPI with different pH.
